# Supplementary material for: Methionine Oxidation Perturbs the Structural Core of the Prion Protein and Suggests a Generic Misfolding Pathway
Source: PubMed Central journal article supplement — J Biol Chem. 2012 May 31;287(34):28263–75. doi: 10.1074/jbc.M112.354779 (PMC3436581; doi:10.1074/jbc.m112.354779), 2012-05-31
Supplement: supp_M112.354779_jbc.M112.354779-1.pdf [file supp_M112.354779_jbc.M112.354779-1.pdf]

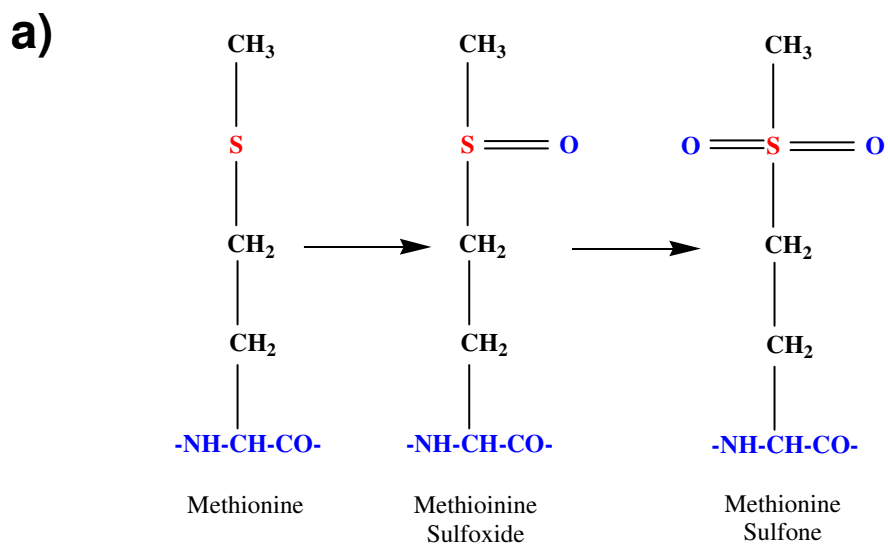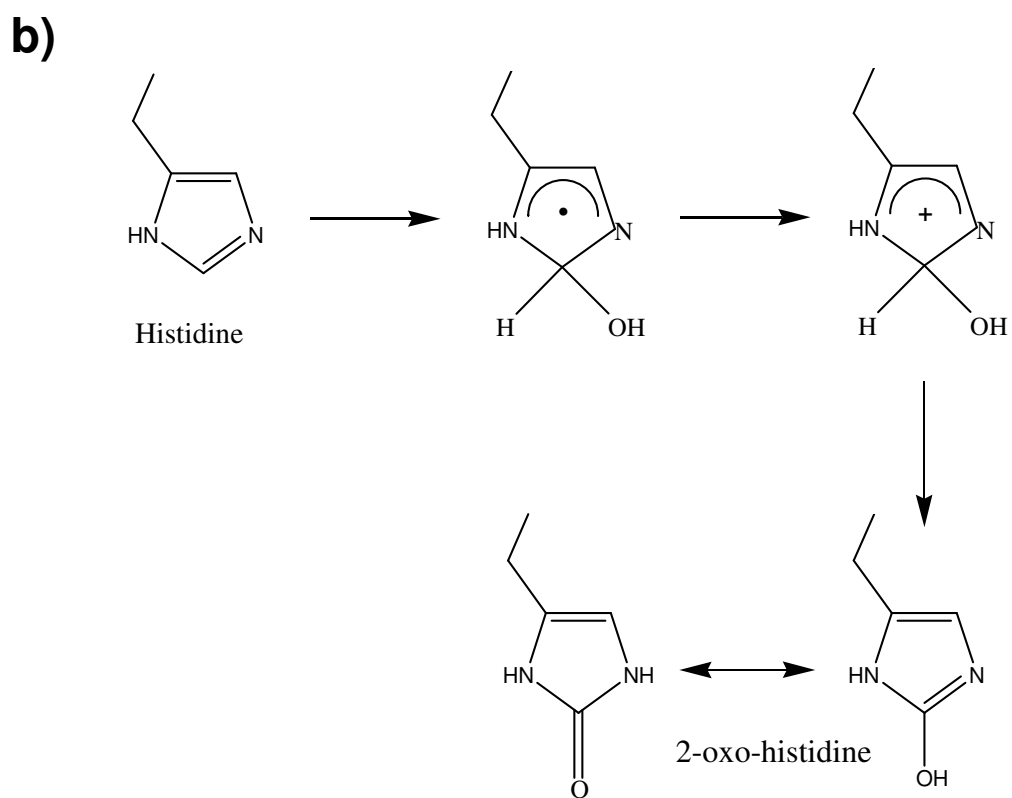

**Supplemental Figure S1:** (a) Oxidation of methionine to methionine-sulfoxide and methionine-sulfone via hydrogen peroxide. (b) Copper catalyzed oxidation of histidine to 2-oxo-histidine.

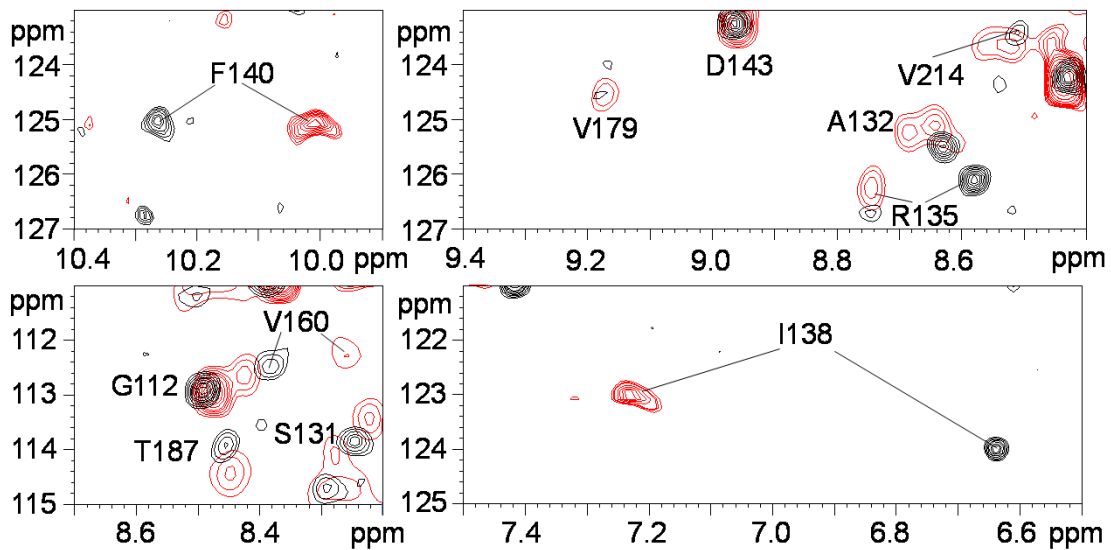

**Supplemental Figure S2 : 2D  $^1\text{H}$ - $^{15}\text{N}$  HSQC of  $\text{H}_2\text{O}_2$  Oxidized PrP(23-231)**

Un-oxidized PrP(23-231) spectra (black), oxidized PrP(23-231) after 9 hrs incubation at 37 °C (red). PrP(23-231) (130 micromolar) oxidized with 10 mM  $\text{H}_2\text{O}_2$  in 10 mM sodium acetate buffer pH 5.5. Residues perturbed by  $\text{H}_2\text{O}_2$  oxidation are the same to those observed from PrP(113-231), shown in Figure 1.



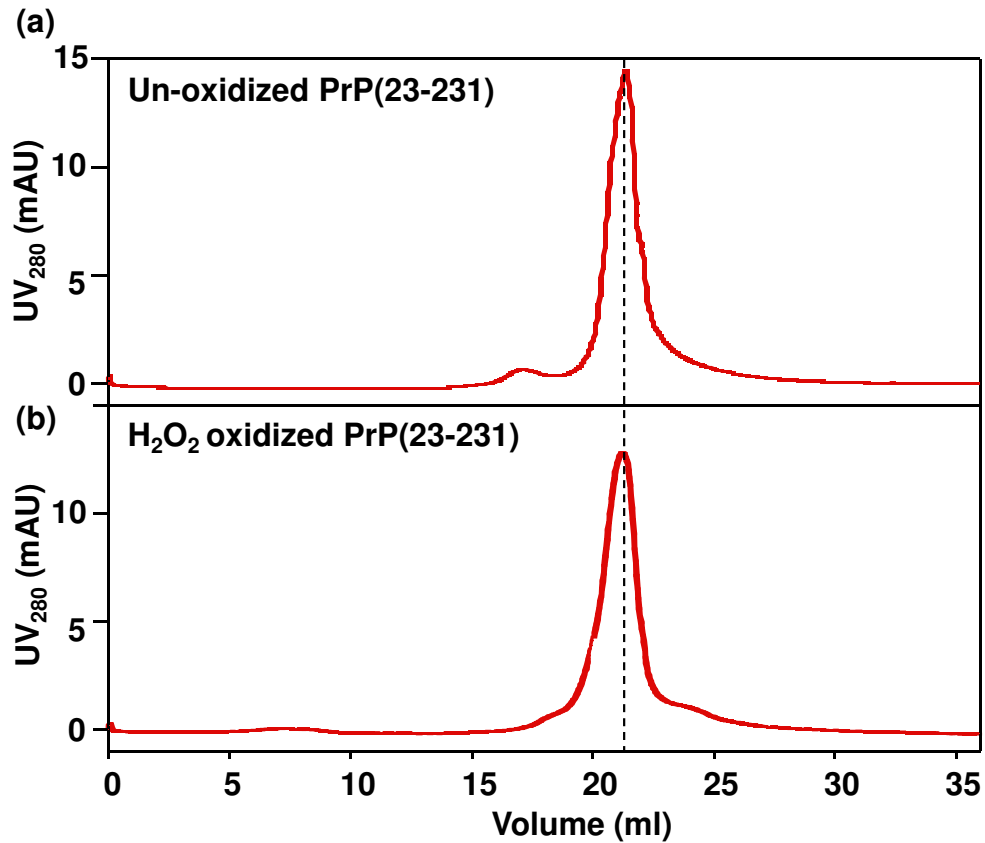

**Supplemental Figure S4: Size Exclusion Chromatogram of oxidized PrP(23-231) by H<sub>2</sub>O<sub>2</sub>.** (a) Un-oxidized PrP(23-231), elution volume typical of a monomer. (b) PrP(23-231) incubated with 10 mM H<sub>2</sub>O<sub>2</sub>, elution volume also typical of a monomer. Samples were incubated at 37 °C, in 10 mM sodium acetate buffer at pH 5.5, for 7 hours, at 3mg/ml PrP(23-231) concentration and diluted to 0.1 mg/ml for injection onto size-exclusion Superdex-200 column.

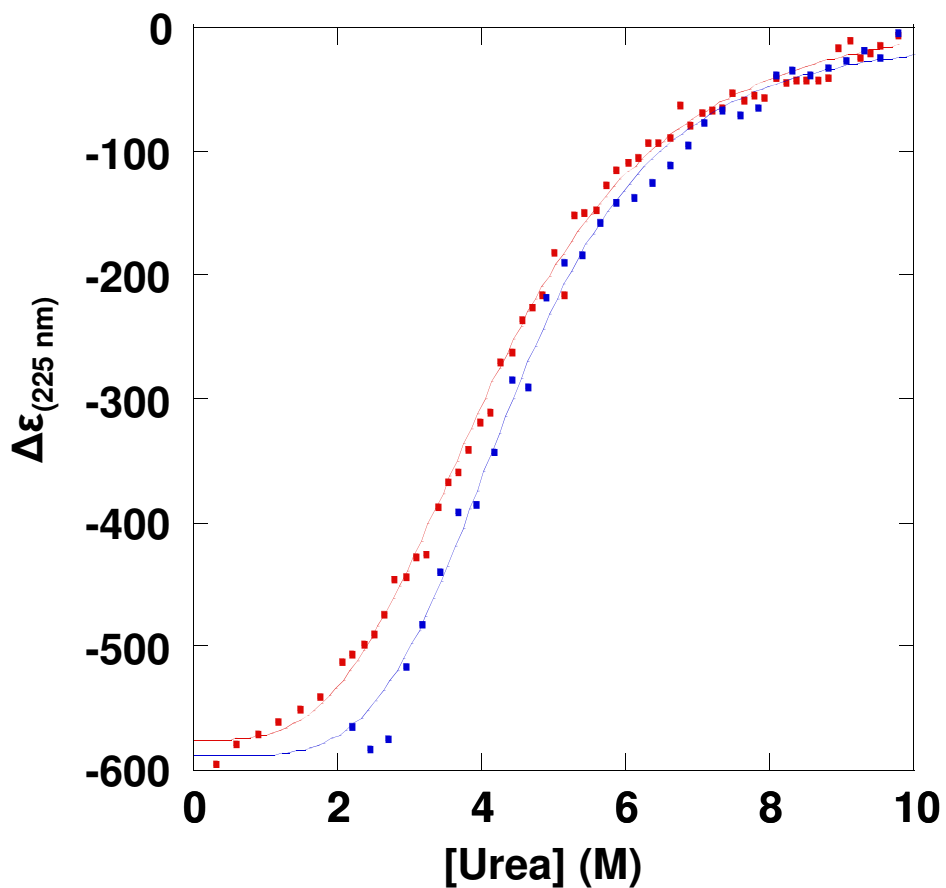

**Supplemental Figure S5: Reversible unfolding of  $\text{H}_2\text{O}_2$  oxidized PrP(23-231).** Circular dichroism of chemical denaturation (using urea) on oxidized PrP(23-231) under the mild conditions; the unfolding trace (red) and refolding trace (blue) show the change at 225 nm. All carried out at pH 5.5, using 10 mM sodium acetate buffer, with a protein concentration of 4.3  $\mu\text{M}$ . Refolding data obtained by dilution of 10 M urea sample. Very similar curves, with the  $[\text{D}]^{50\%}$  for the unfolding is 4.2 M and for the refolding is 4.4 M, indicating urea unfolding is reversible.

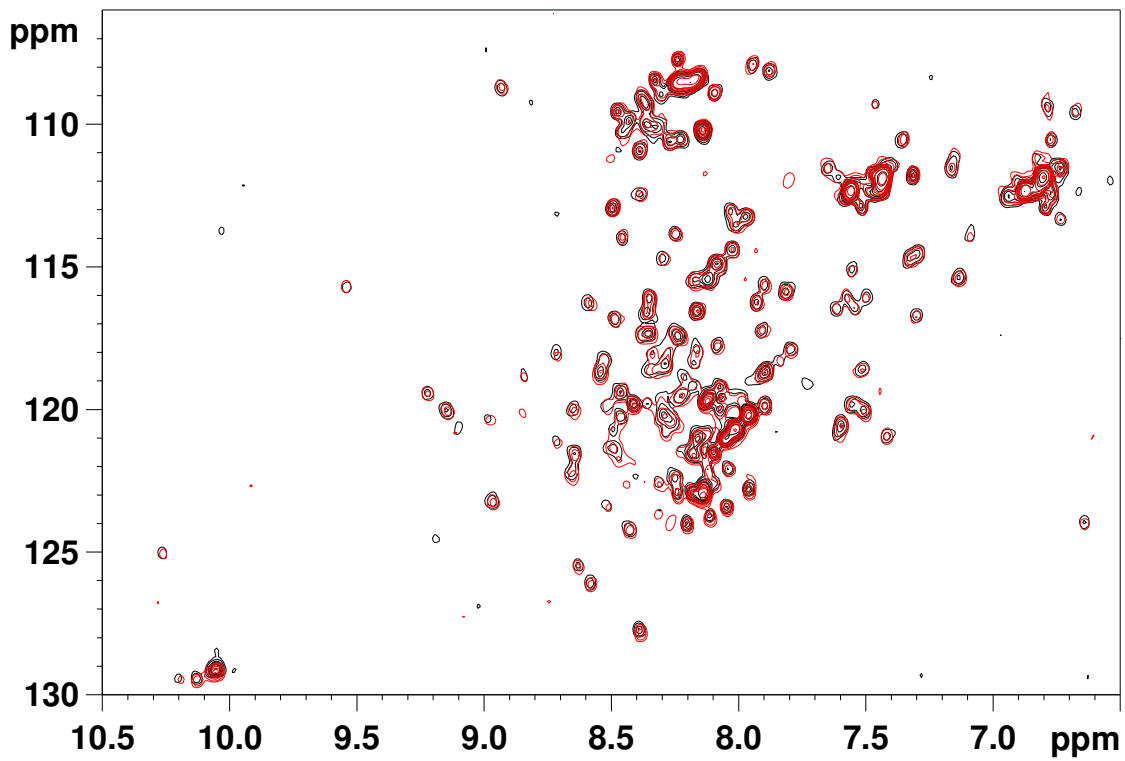

**Supplemental Figure S6: 2D <sup>1</sup>H-<sup>15</sup>N HSQC of PrP(23-231) with and without 0.1 mole equivalents Cu<sup>2+</sup> ions.** PrP(23-231) apo (black) and PrP(23-231) with 0.1 mole equivalents Cu<sup>2+</sup> ions (red). Only very minor perturbations in the <sup>1</sup>H-<sup>15</sup>N HSQC spectra with 0.1 mole equivalents of paramagnetic Cu(II) present. There was no change in the spectra recorded over time.



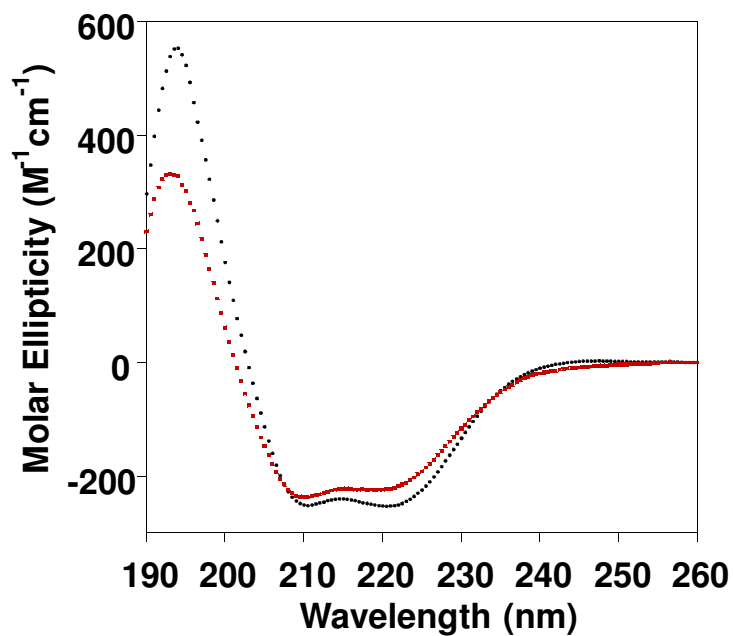

**Supplemental Figure S8: UV-CD spectra with PrP(113-231) H<sub>2</sub>O<sub>2</sub> oxidized under milder conditions.** Red spectra are un-oxidized PrP and Black is oxidized PrP. Oxidizing conditions were PrP(113-231) 130 micromolar with 10 mM H<sub>2</sub>O<sub>2</sub> (no Cu<sup>2+</sup>) and incubated for 24 hrs. 10 mM sodium acetate buffer at pH 5.5. Little change in total helical content when oxidized by H<sub>2</sub>O<sub>2</sub> under these mild conditions.



(a)

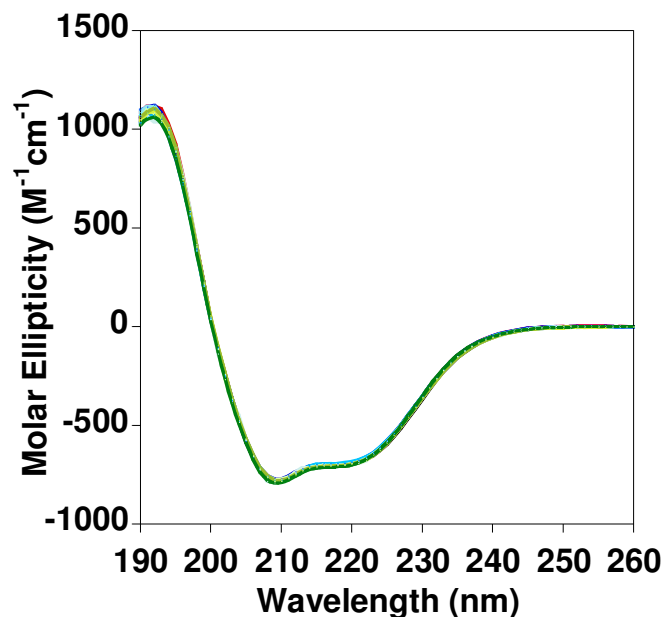

(b)

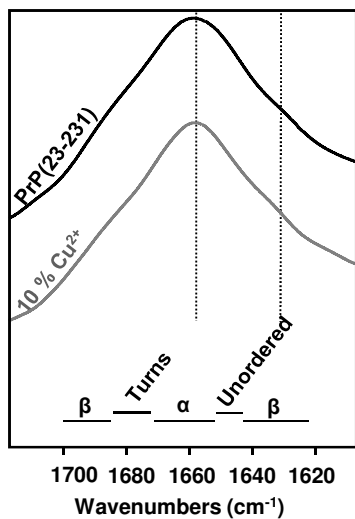

**Supplemental Figure S9:** (a) UV-CD spectrum of PrP<sup>C</sup> with 0.1 mole equivalent Cu<sup>2+</sup> added no H<sub>2</sub>O<sub>2</sub>. PrP(23-231), 0.2 mg/ml, pH 7.4 . Spectra recorded every 2 hrs up to 20 hrs. (b) FT-IR spectra of full-length PrP<sup>C</sup> with 0.1 mole equivalents Cu<sup>2+</sup> added (no H<sub>2</sub>O<sub>2</sub>) no change in  $\alpha$ -helical amide-I band is observed. Low levels of Cu<sup>2+</sup> ions alone (0.1 mole equivalents) have no effect on the structure of PrP<sup>C</sup> and structure remained unchanged over 20 hours.

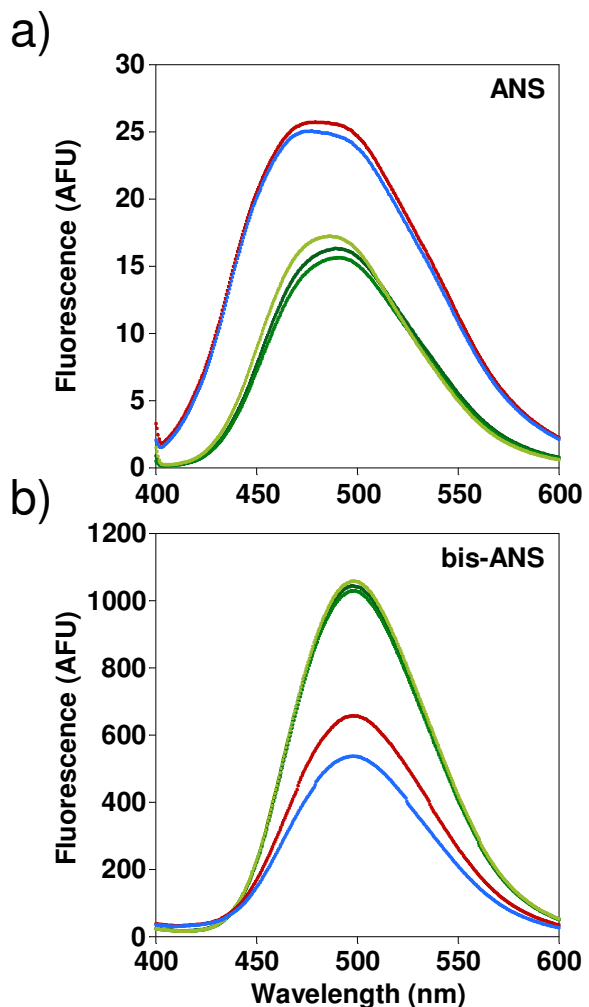

**Supplemental Figure S10: ANS (a) and bis-ANS (b) fluorescence for oxidized ( $\text{H}_2\text{O}_2$ ) and copper oxidized PrP using harsh oxidizing conditions.**

PrP(23-231) 4  $\mu\text{M}$  was oxidized by incubation with 10 mM  $\text{H}_2\text{O}_2$  (Red) or with 10 mM  $\text{H}_2\text{O}_2$  plus 0.1 mol equivalents  $\text{Cu}^{2+}$  ions (blue). Samples were incubated for 22 hours at 37  $^\circ\text{C}$ . Un-oxidized PrP(23-231) 4  $\mu\text{M}$  is also shown (green). In contrast to the mildly oxidizing conditions, little ANS fluorescence and no bis-ANS fluorescence relative to un-oxidized PrP<sup>C</sup> is not observed. This suggests that the strongly oxidized PrP does not have molten-globule like properties.

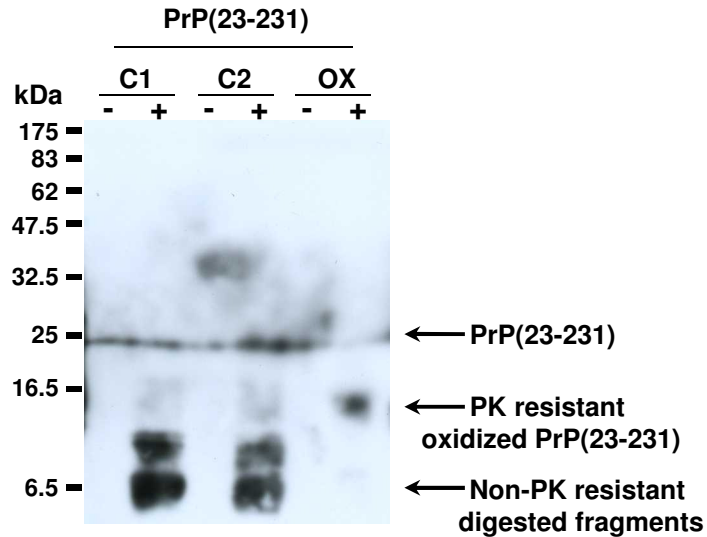

**Supplemental Figure S11: Proteinase K treatment of PrP<sup>C</sup> under harsh H<sub>2</sub>O<sub>2</sub> oxidizing conditions**

A western blot of proteinase K treatment of 50 ng of PrP(23-231) was prepared following SDS-PAGE (14% gel). In the absence of proteinase K “-” and in the presence of 20 mole equivalents of proteinase K “+”. Two controls were used the first was PrP(23-231) with 10 mM NaOAc, pH 5.5, incubated at 4 °C for 47 hours (C1) and the second was PrP(23-231) with 10 mM NaOAc, pH 5.5, incubated at 37 °C for 47 hours (C2). PrP(23-231) with 10 mM H<sub>2</sub>O<sub>2</sub> in the presence of 10 mM NaOAc, pH 5.5, incubated at 37 °C for 47 hours (OX). A primary monoclonal antibody (ICMS-18), detects mouse PrP<sup>C</sup>, was used when immunostaining. Mouse HRP-conjugated secondary antibody was used for detection. The highlighted band corresponds to a ~13 kDa fragment which is PK resistant, this is formed by the harsh H<sub>2</sub>O<sub>2</sub> treatment typical of digestion into PrP(90-231). Both of the controls of un-oxidized PrP<sup>C</sup> are not PK resistant producing smaller 6-10 kDa fragments from the PK digest.

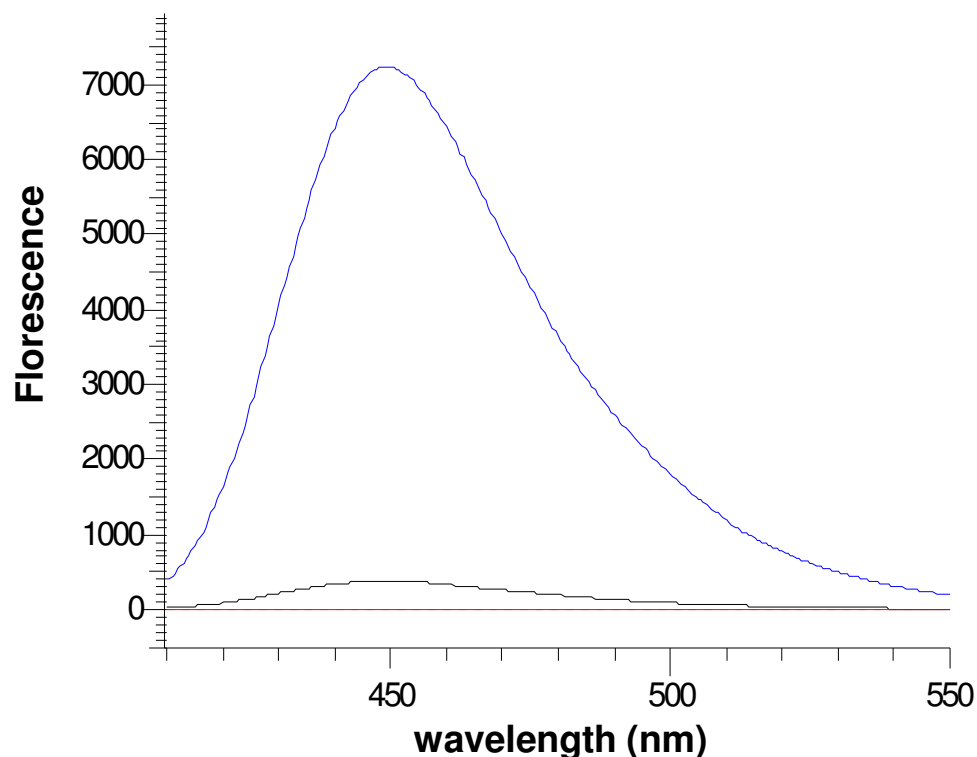

**Supplemental Figure S12: Detection of hydroxyl radical by 3-CCA assay.** Fluorescence signal at 450 nm indicates the presence of hydroxyl radicals. Spectra confirm that  $\text{H}_2\text{O}_2$  and  $\text{Cu}^{2+}$  will generate hydroxyl radicals.  $\text{Cu}^{2+}$  with  $\text{H}_2\text{O}_2$  after 1 hour (black) and 20 hours (blue) at 37 °C. Incubation of  $\text{H}_2\text{O}_2$  in absence of  $\text{Cu}^{2+}$  ions will not generate an appreciable fluorescence signal.  $\text{H}_2\text{O}_2$  (2.5 mM) and  $\text{Cu}^{2+}$  ions (25  $\mu\text{M}$ ) in phosphate buffer at pH 7.4. Hydroxyl radical detection was carried out using 3-Coumarin Carboxylic Acid (3-CCA) assay (King, M., et al. 2003). The product, 7-OH-CCA fluoresces at 450 nm with an excitation maxima at 388 nm. Fluorescence emission spectra were obtained with a Hitachi F-2500 fluorescence spectrophotometer using a 1 cm path-length quartz cuvette (Hellma) and 1 mM 3-CCA.

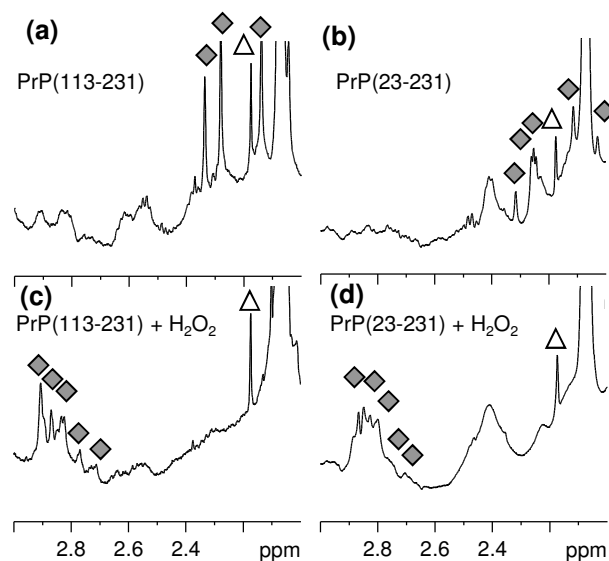

**Supplemental Figure S13: 1D  $^1\text{H}$  NMR spectra of full-length and fragment PrP when incubated with hydrogen peroxide.** Panel (a) and (c) are PrP(113-231) (140 micromolar) in sodium acetate buffer (10 mM) at pH 5.6 at 37 °C. Panel (b) and (d) are PrP(23-231) (130 micromolar) in sodium acetate buffer (10 mM) at pH 5.4 at 37 °C (c) and (d) after 24 hours incubated with  $\text{H}_2\text{O}_2$  (10 mM). The singlets assigned to  $\epsilon\text{H}$  of Met (diamonds) are lost upon oxidation, new resonance's assigned to Met-sulphoxide  $\epsilon\text{H}$  are apparent. Triangle is a sodium acetate peak.

It has been possible to directly monitor oxidation of the Met residues using simple 1D  $^1\text{H}$  NMR methods. Even for full-length PrP it is possible to observe the singlet signals for the  $\epsilon\text{H}$  methyl proton of Met residues in the 1D  $^1\text{H}$  NMR spectra. Addition of  $\text{H}_2\text{O}_2$  causes the gradual loss of the signals at  $\sim 2.5$  ppm and appearance of new signals downfield at  $\sim 2.9$  ppm for the sulphoxide for of  $\epsilon\text{H}$  of  $\text{Met}^{\text{OX}}$ . Complete loss of un-oxidized methionine  $\epsilon\text{CH}_3$  NMR signals are apparent within 24 hours, while, other resonances are unaffected in particular the His  $\epsilon\text{H}$  singlets remain unaffected. In contrast, a mixture of  $\text{Cu}^{2+}$  with  $\text{H}_2\text{O}_2$  is sufficient to generate hydroxyl radicals. The hydroxyl radicals is highly reactive, in particular, the His residues which chelate the  $\text{Cu}^{2+}$  ions are oxidized to generate 2-oxo-His species.  $^1\text{H}$  NMR indicates loss of His  $\epsilon\text{H}$  signals, although the oxidized side-chain is difficult to observe.
